# Supplementary material for: Transgenerational Variations in DNA Methylation Induced by Drought Stress in Two Rice Varieties with Distinguished Difference to Drought Resistance
Source: PubMed Central journal article supplement (PMC3823650; doi:10.1371/journal.pone.0080253), 2013-11-11
Supplement: pone.0080253.s001.pdf [file pone.0080253.s001.pdf]

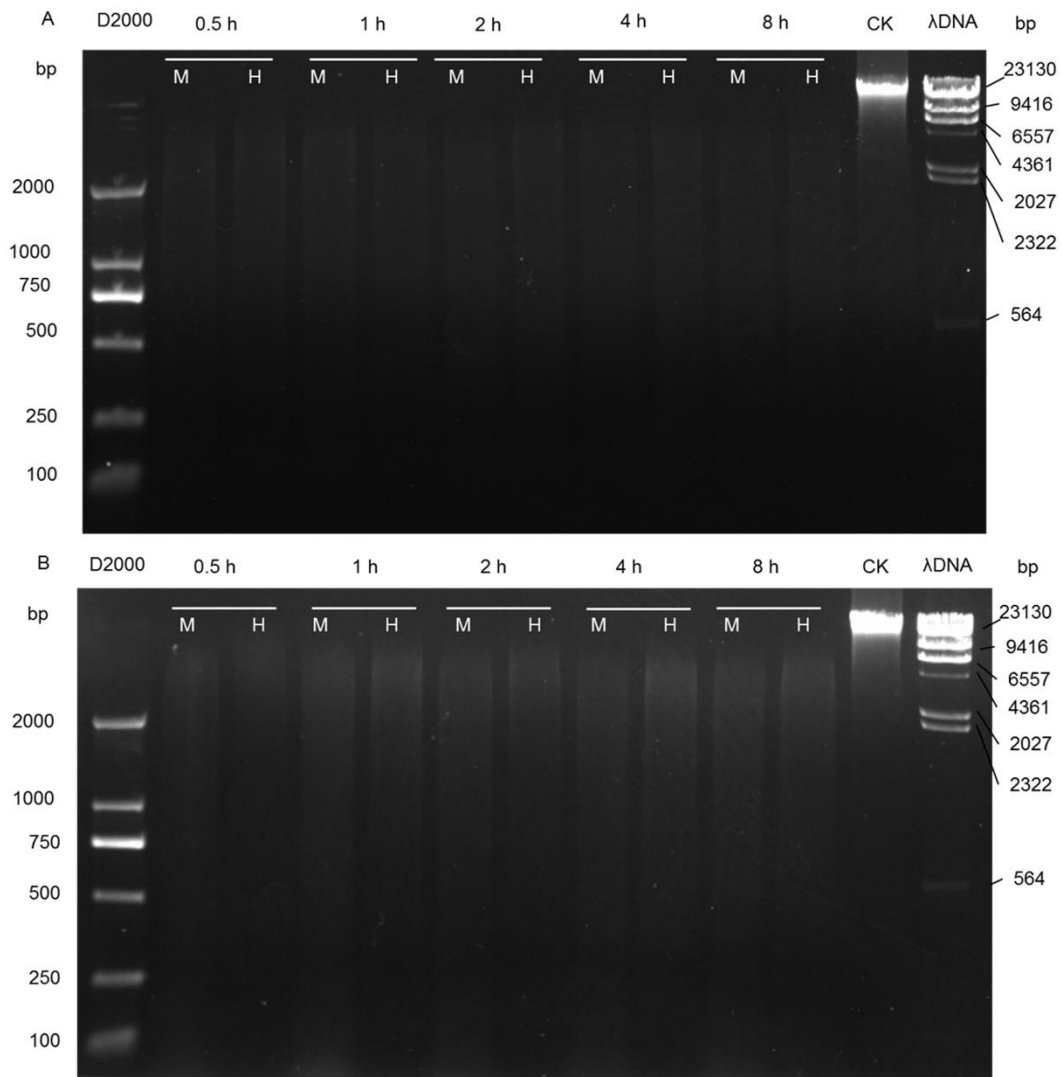

Fig S1 Restriction digestion efficiency identification. (A) II-32B; (B) Huhan-3. M represent EcoR I /Msp I lane, H represent EcoR I /Hpa II lane, CK was negative control.
