# Supplementary material for: Transgenerational Variations in DNA Methylation Induced by Drought Stress in Two Rice Varieties with Distinguished Difference to Drought Resistance
Source: PubMed Central journal article supplement (PMC3823650; doi:10.1371/journal.pone.0080253), 2013-11-11
Supplement: pone.0080253.s002.pdf [file pone.0080253.s002.pdf]

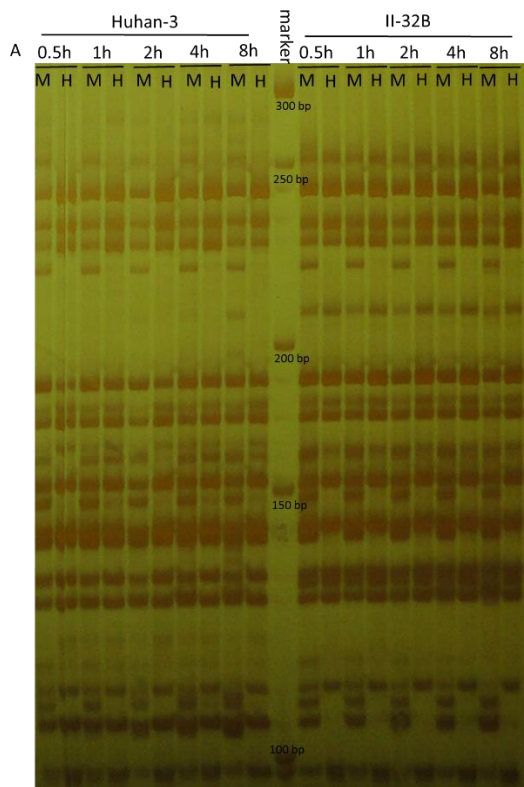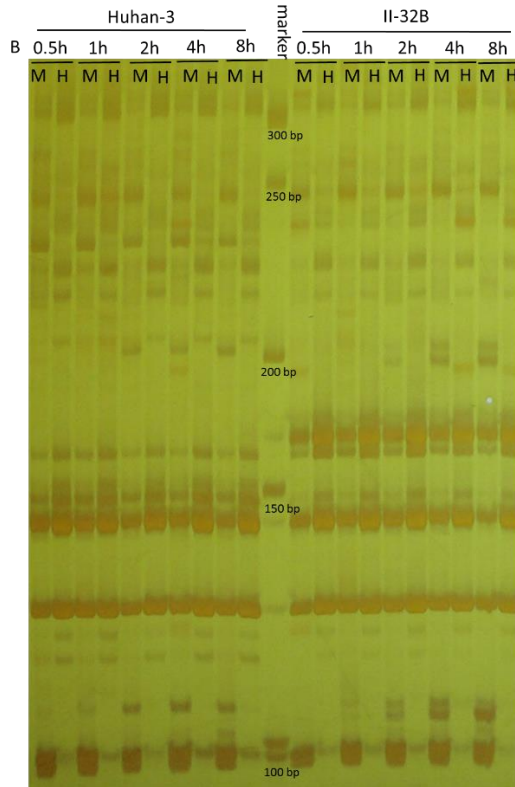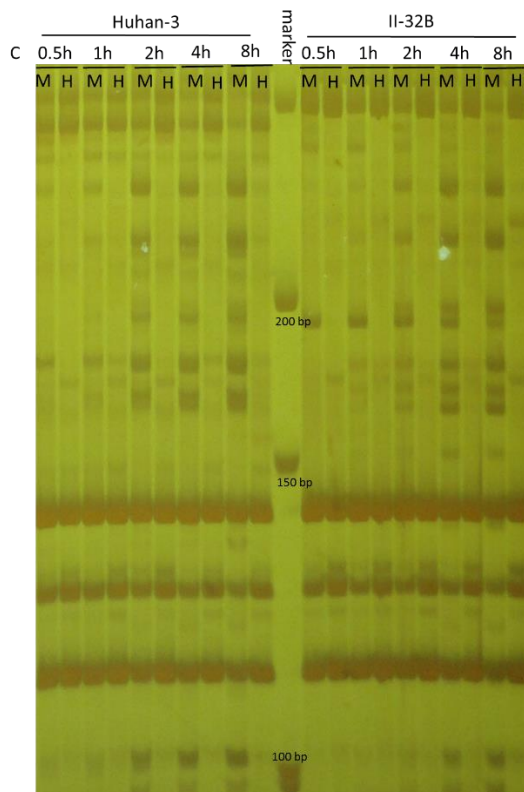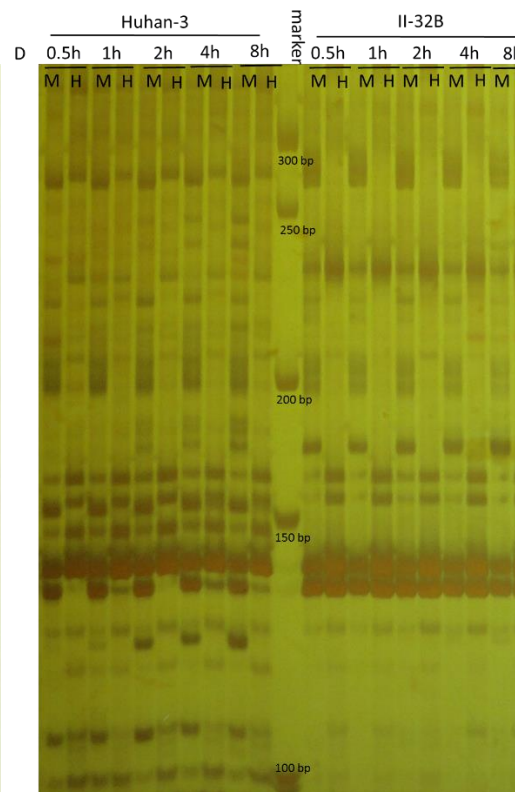

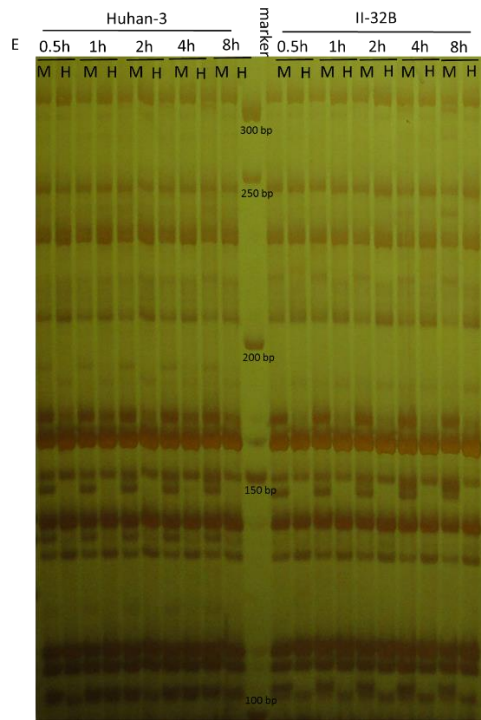

Fig S2 Selective amplification with primer-pairs of E15/HM37 (A), E08/HM310 (B), E07/HM37 (C), E06/HM312 (D) and E03/HM35 (E) for five digestion sets of both varieties.
