# Supplementary material for: Transgenerational Variations in DNA Methylation Induced by Drought Stress in Two Rice Varieties with Distinguished Difference to Drought Resistance
Source: PLoS One. 2013 Nov 11;8(11):e80253. doi: 10.1371/journal.pone.0080253 (PMC3823650; doi:10.1371/journal.pone.0080253)
Supplement: Table S7 — 24 genes related to 17 of 24 loci which largely affected by drought stress in Huhan-3, re-methylated in CK vs. DT in G0. (XLSX) [file pone.0080253.s009.xlsx]

## Sheet: Sheet1
Table S7 24 genes related to 17 of 24 loci which largely affected by drought stress in Huhan-3, re-methylated in CK vs. DT in G0
Loci	bp	Chr.	Gene Name	Location	Annotation
1-7	90	9	LOC_Os09g30150	exon1	AGC_PVPK_like_kin82y.16 - ACG kinases include homologs to PKA, PKG and PKC, expressed
7-8	70	1	LOC_Os01g13840	intron	PE-PGRS family protein, putative
9-5	170	1	LOC_Os01g23080	promoter	conserved hypothetical protein
9-5	170	1	LOC_Os01g23090	promoter	retrotransposon protein, putative, Ty1-copia subclass
9-5	170	1	LOC_Os01g23100	3'UTR	hypothetical protein
15-11	350	1	LOC_Os01g62990	exon5	ATROPGEF7/ROPGEF7, putative, expressed
4-7	210	1	LOC_Os01g72930	exon1	pentatricopeptide, putative, expressed
12-4	180	2	LOC_Os02g45460	exon1	expressed protein
3-2	120	2	LOC_Os02g53160	exon	tyrosine phosphatase family protein
9-5	170	3	LOC_Os03g22750	3'UTR	OsFBX83 - F-box domain containing protein
13-5	130	3	LOC_Os03g50210	exon3	DUF292 domain containing protein, expressed
10-7	140	3	LOC_Os03g53410	intron	protein kinase domain containing protein, expressed
5-1	210	3	LOC_Os03g61210	intron	domain of unknown function domain containing protein, expressed
					EGFAM000001217 family，MAP kinase-activating protein C22orf5, putative, expressed
9-5	170	5	LOC_Os05g25390	promoter	tyrosine protein kinase domain containing protein, putative, expressed
14-9	250	6	LOC_Os06g14390	exon1	1-aminocyclopropane-1-carboxylate oxidase homolog 4,putative, expressed
9-5	170	8	LOC_Os08g13650	3'UTR	hypothetical protein
9-5	170	8	LOC_Os08g13660	promoter	transposon protein, putative, unclassified
6-7	130	8	LOC_Os08g15890	promoter	hypothetical protein
6-7	130	8	LOC_Os08g15900	promoter	transposon protein, putative, unclassified
9-5	170	10	LOC_Os10g20290	promoter	hypothetical protein
9-6	180	11	LOC_Os11g24440	promoter	expressed protein
12-16	80	11	LOC_Os11g38230	promoter	OsFBDUF61 - F-box and DUF domain containing protein
12-16	80	11	LOC_Os11g38240	promoter	DUF538 domain containing protein, putative, expressed
1-12	120	12	LOC_Os12g27970	3'UTR	hypothetical protein
9-5	170	7		intergenic
9-5	170	1		intergenic
12-15	70	2		intergenic
14-14	100	3		intergenic
Red font part represent loci which keep their changed DNA methylation status in G6.
